# Supplementary material for: Lens development depends on a pair of highly conserved Sox21 regulatory elements
Source: PubMed Central journal article supplement (PMC3480646; doi:10.1016/j.ydbio.2012.02.025), 2012-05-01

## SUPPLEMENTARY TABLES

TABLE S1

CNE number and corresponding accession numbers in the CONDOR database  
(<http://condor.nimr.mrc.ac.uk/>)

|        |                                                                  |
|--------|------------------------------------------------------------------|
| CNE 1  | CRCNE00000565                                                    |
| CNE 2  | CRCNE00000566 + CRCNE00000567                                    |
| CNE 3  | CRCNE00000568 + CRCNE00000569 + CRCNE00000570                    |
| CNE 4  | CRCNE00000571                                                    |
| CNE 5  | CRCNE00000572                                                    |
| CNE 6  | CRCNE00000573                                                    |
| CNE 7  | CRCNE00000596 + CRCNE00000574                                    |
| CNE 8  | CRCNE00000597 + CRCNE00000575                                    |
| CNE 9  | CRCNE00000576 + CRCNE00000577                                    |
| CNE 10 | CRCNE00000578                                                    |
| CNE 11 | CRCNE00000579                                                    |
| CNE 12 | CRCNE00000580                                                    |
| CNE 13 | CRCNE00000581                                                    |
| CNE 14 | CRCNE00000582 + CRCNE00000583                                    |
| CNE 15 | CRCNE00000584 + CRCNE00000585 + CRCNE00000586 +<br>CRCNE00000617 |
| CNE 16 | CRCNE00000587                                                    |
| CNE 17 | CRCNE00000589 + CRCNE00000590                                    |
| CNE 18 | CRCNE00000591                                                    |
| CNE 19 | CRCNE00000592 + CRCNE00000593                                    |

TABLE S2. Percentages of individuals with GFP expression at 30 hpf.

| CNE        | 1     | 2     | 3     | 4     | 5*    | 6     | 7     | 8     | 9     | 10    | 11    | 12    | 13    | 14    | 15*  | 16    | 17    | 18  | 19    |
|------------|-------|-------|-------|-------|-------|-------|-------|-------|-------|-------|-------|-------|-------|-------|------|-------|-------|-----|-------|
| forebrain  | 0     | 3.92  | 6.25  | 18.92 | 0     | 78.18 | 13.20 | 75.00 | 43.48 | 100   | 0     | 16.67 | 78.95 | 3.23  | 0    | 23.08 | 72.22 | 0   | 17.07 |
| midbrain   | 17.07 | 0     | 6.25  | 13.51 | 0     | 7.27  | 1.90  | 79.17 | 4.35  | 80.56 | 3.23  | 0     | 10.53 | 0     | 0    | 0     | 50.00 | 0   | 14.63 |
| hindbrain  | 14.63 | 13.73 | 6.25  | 43.24 | 0     | 16.36 | 5.70  | 87.50 | 4.35  | 97.22 | 3.23  | 11.11 | 0.00  | 0.00  | 0    | 7.69  | 61.11 | 0   | 26.83 |
| sp. cord   | 0.00  | 3.92  | 0     | 51.35 | 0     | 12.73 | 7.50  | 54.17 | 0     | 75.00 | 0.00  | 44.44 | 10.53 | 6.45  | 0    | 0.00  | 69.44 | 0   | 0     |
| retina     | 0     | 1.96  | 0     | 0     | 0     | 33.33 | 0     | 70.83 | 8.7   | 69.44 | 0     | 0     | 0     | 0     | 0    | 0     | 52.78 | 0   | 0     |
| lens       | 0     | 0     | 0     | 0     | 33.33 | 29.63 | 1.89  | 16.67 | 4.35  | 0     | 0     | 0     | 0     | 0     | 0    | 0     | 13.89 | 0   | 0     |
| ear        | 0     | 9.80  | 0     | 0     | 0     | 1.81  | 75.50 | 12.50 | 0     | 72.22 | 0     | 33.33 | 0     | 35.48 | 100  | 26.92 | 0     | 0   | 0     |
| notochord  | 0     | 62.75 | 0     | 0     | 0     | 1.81  | 0     | 8.33  | 0     | 0     | 0     | 5.56  | 0     | 0     | 0    | 3.85  | 8.33  | 0   | 0     |
| muscle     | 0     | 0     | 0     | 2.70  | 66.66 | 0     | 0     | 12.50 | 4.35  | 30.56 | 0     | 11.11 | 0     | 3.23  | 0    | 3.85  | 8.33  | 0   | 36.59 |
| blood      | 0     | 3.92  | 6.25  | 2.70  | 0     | 0     | 0     | 4.17  | 0     | 2.78  | 3.23  | 5.56  | 15.79 | 6.45  | 0    | 11.54 | 0     | 0   | 34.15 |
| heart      | 0     | 0     | 0     | 2.70  | 00    | 0     | 0     | 0     | 0     | 2.78  | 6.45  | 0.56  | 15.79 | 58.06 | 0    | 0     | 2.78  | 0   | 0     |
| skin       | 53.66 | 11.76 | 62.50 | 16.22 | 0     | 5.45  | 20.80 | 16.67 | 43.48 | 66.67 | 29.03 | 22.22 | 0     | 9.68  | 0    | 34.62 | 16.67 | 0   | 17.07 |
| fins       | 34.15 | 3.92  | 50.00 | 5.41  | 0     | 0     | 1.90  | 12.50 | 0     | 8.33  | 12.90 | 5.56  | 5.26  | 0     | 0    | 0     | 0     | 0   | 4.88  |
| other      | 31.71 | 11.76 | 18.75 | 8.12  | 0     | 9.09  | 13.21 | 12.50 | 17.39 | 25.00 | 74.19 | 22.22 | 31.58 | 3.23  | 0    | 3.85  | 22.22 | 0   | 26.83 |
| embryos    | 189   | 364   | 49    | 130   | 81    | 200   | 370   | 28    | 71    | 40    | 252   | 44    | 54    | 212   | 125  | 270   | 46    | 117 | 92    |
| %positives | 21.69 | 14.01 | 32.65 | 28.46 | 3.70  | 27.50 | 14.32 | 85.71 | 32.39 | 90.00 | 12.30 | 40.91 | 35.19 | 14.62 | 0.80 | 9.63  | 78.26 | 0   | 44.57 |

'Embryos' shows the total number of injected embryos for each single CNE and '%positives' the percentage of positive embryos in total for each single CNE. The numbers for different anatomical domains correspond to the percentage of positive embryos with GFP expression in that area.

\* Note that for these CNEs the percentage of positive embryos in certain anatomical domains is high because the total number of positive embryos is very low. We do not consider these CNEs to show any enhancer activity in this assay.

TABLE S3. Percentages of individuals with GFP expression at 52 hpf.

| CNE        | 1     | 2     | 3     | 4     | 5*   | 6     | 7     | 8     | 9     | 10    | 11    | 12    | 13    | 14    | 15*  | 16    | 17    | 18  | 19    |
|------------|-------|-------|-------|-------|------|-------|-------|-------|-------|-------|-------|-------|-------|-------|------|-------|-------|-----|-------|
| forebrain  | 0     | 8.70  | 13.33 | 25.53 | 0    | 35.29 | 13.40 | 62.50 | 29.63 | 85.71 | 13.33 | 16.00 | 70.59 | 2.94  | 0    | 13.04 | 30.56 | 0   | 29.73 |
| midbrain   | 31.82 | 4.35  | 33.33 | 23.40 | 0    | 23.53 | 3.00  | 50.00 | 7.41  | 85.71 | 20.00 | 12.00 | 47.06 | 0     | 0    | 10.87 | 47.22 | 0   | 64.86 |
| hindbrain  | 4.55  | 17.39 | 26.67 | 65.96 | 0    | 47.06 | 16.40 | 81.25 | 37.04 | 96.43 | 33.33 | 4.00  | 23.53 | 11.76 | 100  | 15.22 | 72.22 | 0   | 13.51 |
| sp. cord   | 0     | 0     | 6.67  | 48.93 | 0    | 35.29 | 3.00  | 62.50 | 3.70  | 75.00 | 20.00 | 8.00  | 0     | 2.94  | 0    | 2.17  | 66.00 | 0   | 0     |
| retina     | 0     | 0     | 0     | 0     | 0    | 11.76 | 0     | 59.38 | 3.7   | 33.33 | 0     | 4     | 5.88  | 0     | 0    | 0     | 2.78  | 0   | 0     |
| lens       | 4.55  | 0     | 0     | 0     | 0    | 47.06 | 2.99  | 3.13  | 3.7   | 0     | 0     | 0     | 1     | 0     | 0    | 0     | 33.33 | 0   | 0     |
| ear        | 0     | 8.70  | 0     | 0     | 0    | 0     | 76.10 | 0     | 3.70  | 53.57 | 0     | 36.00 | 5.88  | 44.12 | 0    | 43.48 | 11.11 | 0   | 0     |
| notochord  | 0     | 56.52 | 0     | 0     | 0    | 0     | 0     | 3.13  | 0     | 0     | 0     | 4.00  | 0     | 0     | 0    | 2.17  | 0     | 0   | 0     |
| muscle     | 0     | 0     | 0     | 0     | 100  | 0     | 0     | 3.13  | 0     | 10.71 | 0     | 12.00 | 0     | 2.94  | 0    | 4.35  | 0     | 0   | 10.81 |
| blood      | 0     | 0     | 0     | 0     | 0    | 0     | 0     | 0     | 0     | 3.57  | 3.33  | 0     | 0     | 0     | 0    | 0     | 0     | 0   | 5.41  |
| heart      | 0     | 0     | 0     | 2.13  | 0    | 0     | 0     | 6.25  | 0     | 0     | 13.33 | 0     | 5.88  | 61.76 | 0    | 2.17  | 0     | 0   | 0     |
| skin       | 45.45 | 13.04 | 20.00 | 4.26  | 0    | 0     | 0     | 6.25  | 40.74 | 10.71 | 13.33 | 28.00 | 0     | 14.71 | 0    | 23.91 | 0     | 0   | 2.70  |
| fins       | 36.36 | 4.35  | 26.67 | 0     | 0    | 0     | 0     | 3.13  | 3.70  | 0     | 3.33  | 12.00 | 5.88  | 0     | 0    | 0     | 0     | 0   | 0     |
| other      | 18.18 | 13.04 | 13.33 | 4.26  | 0    | 5.88  | 10.45 | 0     | 14.81 | 3.57  | 36.67 | 48.00 | 5.88  | 5.88  | 0    | 0     | 5.56  | 0   | 13.51 |
| embryos    | 154   | 182   | 41    | 109   | 74   | 44    | 206   | 38    | 64    | 29    | 179   | 36    | 30    | 212   | 98   | 263   | 44    | 105 | 81    |
| %positives | 14.29 | 12.64 | 36.59 | 43.12 | 1.36 | 38.64 | 32.52 | 84.21 | 42.12 | 96.56 | 16.76 | 69.44 | 56.67 | 16.04 | 1.02 | 17.49 | 81.82 | 0   | 45.68 |

'Embryos' shows the total number of injected embryos for each single CNE and '%positives' the percentage of positive embryos in total for each single CNE. The numbers for different anatomical domains or tissues correspond to the percentage of positive embryos with GFP expression in that area.

\* Note that for these CNEs the percentage of positive embryos in certain anatomical domains is high because the total number of positive embryos is very low. We do not consider these CNEs to show any enhancer activity in this assay.

TABLE S4

Primer sequences used to amplify Fugu (*Tr*) and zebrafish (*Dr*) CNEs

| <b>CNE</b>  | <b>forward primer</b>     | <b>reverse primer</b>    |
|-------------|---------------------------|--------------------------|
| <b>Tr1</b>  | ATTGCATTGTAAAGTGCCTATTT   | CCCCATAGAGAGAGATAAACCA   |
| <b>Tr2</b>  | TTATTTCCAAAACGGGGTTG      | AAAGCCATCCTCTGTCATCG     |
| <b>Tr3</b>  | TTCCTGTAAAATTCATTTGTGATG  | AAAAGGAGCGGAGGGTGATA     |
| <b>Tr4</b>  | CTGAAAGACCCCATCAGACC      | ATAGGGTTTCCAGGGCTGTC     |
| <b>Tr5</b>  | CCTTGAGAGGCCACCAAAT       | GCCCTCCACTTTTTCTTTTTC    |
| <b>Tr6</b>  | CTGGGCCATGAGAGCGG         | CAGGCATGCATCTGAAGC       |
| <b>Tr7</b>  | CCACGGTGACCTTCATGC        | CTGCCAGCTCCTTCTGAG       |
| <b>Tr8</b>  | GATGAGGCTGAAACACAAAGG     | GCCTCAGAGGGGGATGAAT      |
| <b>Tr9</b>  | AAGTAGATAAATGCCCTCCAAG    | ATCTCACGCATCTGCACTC      |
| <b>Tr10</b> | GCTTTTCCCACCCCTAAACT      | CCATAAGTCATACAAGCTGC     |
| <b>Tr11</b> | GTCAGACAGGGGGTGTGATT      | GCAGCGGTATCAAATTGCTT     |
| <b>Tr12</b> | GCTGAAAAGAATACAGGCAATG    | AACATTGAGTCATACTCAGGC    |
| <b>Tr13</b> | CTGACCAAGCTTCAGCTTC       | GTGCACTGCAACTGCAAGA      |
| <b>Tr14</b> | CAACTGGAACTATAAATGTATC    | ATTCGAGGCTGCACGGTGC      |
| <b>Tr15</b> | TCTTCTGGAATTTGTATGTTTTGTG | AGGCCGGTCCTGGTTCTA       |
| <b>Tr16</b> | CACGTGGACGTGAGAGTG        | TCCTGACAGATCTGCGCG       |
| <b>Tr17</b> | GGAAGAAAGCTGAAGGAAC       | CCACCTTTTGCATTCACTC      |
| <b>Tr18</b> | GTTTCCAAGGGAGGGGAAA       | CTGTGTCCCGTGTTGGAG       |
| <b>Tr19</b> | GACACCCGGTTCCATTCTT       | CGTCAAACCTTTCCAGAGCG     |
| <b>Dr6</b>  | AGGGGTTGTTTGGGTCTTTT      | CCACACAGACTGGAATAGTGTAGC |
| <b>Dr12</b> | TAAACAGTGCGAAGAATGG       | CCTCCGCAAGCTGTACCTTC     |
| <b>Dr17</b> | GGGGCACTAACTGAAAGAA       | CGTTTCCAGAAAAGCACAGA     |

TABLE S5

Oligos used to generate templates for RNA probes. The T7 promoter sequence is underlined.

GFP:

Forward: CAAGGGCGAGGAGCTGTT

Reverse: TAATACGACTCACTATAGGGCTTGTACAGCTCGTCCATGC

Zebrafish *sox21a*:

Forward: AGCATTTAAAGCCAGGTCAC

Reverse: TAATACGACTCACTATAGGAATGGTTAGCATGTAAACAAGAGC

Zebrafish *sox21b*:

Forward: AGCGTGAAGTAAACCTGGAGA

Reverse: TAATACGACTCACTATAGGAGACTGGATCCGTTTCAGCAC

TABLE S6

Primers used to amplify the targeting constructs for the removal of CNEs from the BAC. Vector sequences are underlined.

**CNE 6 forward:** TTCCATTTGGCCGGGGGGGCTTTTATACTGGGCCATGAGAGCGG  
TACCGTTCGTATAGTACACATTATACGAAGTTATGC

**CNE 6 reverse:** AGGCATGCATCTGAAGCAACATAGGAAAGATAATGTATCCCAAG  
TACCGTTCGTATAGTACACATTATACGAAGTTATCT

**CNE 8 forward:** TTCAGTGGCGGGTGATGAAAGAGATGAGGCTGAAACACAAAGGC  
TACCGTTCGTATAGTACACATTATACGAAGTTATGC

**CNE 8 reverse:** CCTACTTTAATTTCCCTGCAGGCCTCAGAGGGGGATGAATTCAG  
TACCGTTCGTATAATGTGTACTATAACGAAGTTATCT

**CNE 17 forward:** TGGGAAGAAAGCTGAAGGAACTTTTTTTTTCCCCCTCCAACTC  
TACCGTTCGTATAGTACACATTATACGAAGTTATGC

**CNE 17 reverse:** CCACCTTTTGCATTCACTCCCATCTCAGACAGAAAAACACAG  
TACCGTTCGTATAATGTGTACTATAACGAAGTTATCT

TABLE S7

Oligo sequences for the dissection of Fugu (*Tr*) CNE 6. Bases different from the WT sequence are highlighted in yellow.

| construct | forward                                 | reverse                                |
|-----------|-----------------------------------------|----------------------------------------|
| Tr6-ABC   | TGTCTGCTCGCATTACGTG                     | AATGTATCCCAAGGCTACAAAA                 |
| Tr6-AB    | TGTCTGCTCGCATTACGTG                     | TTTGAGAGAGCTGACAGTAACCA                |
| Tr6-BC    | GGCTTCCTGTTCATTAGACTTCTT                | AATGTATCCCAAGGCTACAAAA                 |
| Tr6-A     | TGTCTGCTCGCATTACGTG                     | GGCTTGCATAAACACTATTTAAAAC              |
| Tr6-B     | GGCTTCCTGTTCATTAGACTTCTT                | TTTGAGAGAGCTGACAGTAACCA                |
| Tr6-C     | AAGCCATTGTCGTCCATTGT                    | AATGTATCCCAAGGCTACAAAA                 |
| Tr6-soxm1 | GGCCCACTGCATCTTTTCGG<br>GTTACTTTCTCATCA | AATGTATCCCAAGGCTACAAAA                 |
| Tr6-soxm2 | GGTGGCAAGCGCATGATGCG<br>CCTGTTGTATG     | CATACAACAGGCGCATCATGCG<br>CTTGCCACC    |
| Tr6-soxm3 | TCTTTTCACCTCTGCATGATG<br>CGCCGGCTTTG    | CAAAGCCGGCGCATCATGCGAGA<br>GGTGAAAAGA  |
| Tr6-soxm4 | GTGTTTATGCAAGCCATCATC<br>GTCCATTGTGCGTC | GACGCACAATGGACGATGATGG<br>CTTGATAAACAC |
| Tr6-soxm5 | CCATTGTCGTCCATCATGCGT<br>CCCGTCCTAATG   | CATTAGGACGGGACGCATGATG<br>GACGACAATGG  |
| Tr6-soxm6 | TGTCTGCTCGCATTACGTG                     | CCAAGGCTATGAAAGCAGGCAA<br>ATCACTGTGC   |

# SUPPLEMENTARY FIGURE S1

**A**

|         |                                                              |           |                                               |           |                          |                          |     |
|---------|--------------------------------------------------------------|-----------|-----------------------------------------------|-----------|--------------------------|--------------------------|-----|
| human   | AAGTGCCC                                                     | CAAAACA   | -GGATTCCCTTATGCTTTAATTCTCTTTATTTTCTCACCGTAAA  | 59        |                          |                          |     |
| chicken | AAGTGCCCT                                                    | CAAAAAA   | AAGGATTCCCTTATGCTTTAATTCTCTTTATTTTGTGACTGTAAA | 60        |                          |                          |     |
| mouse   | AAATGCCCC                                                    | CAAAACA   | -AGACTCCCTTATGCTTTAATTCTCTTTATTTT-CCGACTGTCAA | 58        |                          |                          |     |
| frog    | -----                                                        | -----     | GGATCCATGT-TTTCAGCTATTCTTTATTTTCAGGGACTGTAAA  | 22        |                          |                          |     |
| zfish   | -----                                                        | -----     | GGGCGACTTTCTCATCACTCCTCCTAATGCTG-             | 32        |                          |                          |     |
| fugu    | -----                                                        | AAGGGCCCA | CTTTTCGGGTTACTTTCTCATCATTTCTCCTAATGTAGA       | 54        |                          |                          |     |
|         |                                                              |           | * * * * *                                     |           |                          |                          |     |
|         |                                                              |           |                                               |           |                          |                          |     |
| human   | GACCCCTGGGGTAAATGCCAGCCCAANTCCCGCGTATATGTTACTGTGAGCCTGC      |           |                                               | 119       |                          |                          |     |
| chicken | GACCCATGGGGTAAATGCCAGTCCCACAANTCCTGCAGTTATATGTTACTGTGAGCCTGC |           |                                               | 120       |                          |                          |     |
| mouse   | GACCCCTGGGGTAAATGGCAG-CCCACAATTCATCTTTAGATGGTCACTGTGAGCCTGC  |           |                                               | 117       |                          |                          |     |
| frog    | GGCCTATGGGGTAAATGCCAGTCCCTTAATCCTGCAGTTATATGTTACTGTGAGCCTGC  |           |                                               | 82        |                          |                          |     |
| zfish   | GACCCACAGGGTCGATGGCAGCCCA                                    | CAATG     | CATCTGTTGTATGGTTCCTGTGAG----                  | 87        |                          |                          |     |
| fugu    | GACCCACAGGGTTGGTGGCAAGCGC                                    | CAATG     | CGCCTGTTGTATGTTACTGTGAGCCTCTC                 | 114       |                          |                          |     |
|         | * * *                                                        | ****      | * * * * *                                     | ****      |                          |                          |     |
|         |                                                              |           |                                               |           |                          |                          |     |
| human   | TCAAATGATGCTTCTGTTCATTAGGCCTCTTTTCATCTGACT                   | CAATG     | TCTTGGCGTTG                                   | 179       |                          |                          |     |
| chicken | TCAAATGATGCTTCTGTTCATTAGGCCTCTTTTCATCTGACA                   | CAATG     | TACTGGCGTTG                                   | 180       |                          |                          |     |
| mouse   | TCATATGATGCTTCTGTTCATTAGTCTCTTTTCATCTGACT                    | CAATG     | TCCCGGCTTTG                                   | 177       |                          |                          |     |
| frog    | TCAAATGATGCTTCTGTTCATTAGACCTCTTTTCATCTAAC                    | CAATA     | CACCGGCTTTG                                   | 142       |                          |                          |     |
| zfish   | ---TAAGGCTTCTGTTCATTAGGCATCTTTTCACCTCCGC                     | CAATA     | AGCAGATTGAG                                   | 142       |                          |                          |     |
| fugu    | TCAAATAAGGCTTCTGTTCATTAGACTTCTTTTCACCTCTGC                   | CAATG     | CGCCGGCTTTG                                   | 174       |                          |                          |     |
|         | * * *                                                        | *****     | * * * * *                                     | *****     |                          |                          |     |
|         |                                                              |           |                                               |           |                          |                          |     |
| human   | CAGCAATCTTAGTCAACGCCCATCTCTTCAATAGCCTGTGAATAGTATTAATGGTGT    |           |                                               | 239       |                          |                          |     |
| chicken | CTGCAATCTTAGTCAACGCCCATCTCTTCAATAGCCTGTGAATAGTATTAATAGTGT    |           |                                               | 240       |                          |                          |     |
| mouse   | CTGCAATCTCCCTCAACGCCCATCTCTTCAATAGCCTGTGAATAGTATTAATGGTGT    |           |                                               | 237       |                          |                          |     |
| frog    | CTGCAATCTTAGTCAACGCCCATCTCTTCAATAGCCTGTGAATAGTATTAATAGTGT    |           |                                               | 202       |                          |                          |     |
| zfish   | CTGCAATGCTGCGTCGCGCCAGCCCTCAATGCCGCGTCAAAAGCCTTAATGCTGTT     |           |                                               | 202       |                          |                          |     |
| fugu    | CAGCAATAGTGTGACGCCCATCTCTTCAATAGCCTGTGAATAGTATTAATAGTGT      |           |                                               | 234       |                          |                          |     |
|         | * * * * *                                                    | * * * * * | * * * * *                                     | *****     |                          |                          |     |
|         |                                                              |           |                                               |           |                          |                          |     |
| human   | TATGCTAGC                                                    | TATTGTG   | CCCTTTGTG                                     | GGTTTGTG  | -TAATTCACAGAGAAAAGTCTGCT | 298                      |     |
| chicken | TATGCTAGC                                                    | TATTGTG   | CCCTTTGTG                                     | GGTTTGTG  | -TAATTCACAGAGAAAAGTCTGCT | 299                      |     |
| mouse   | TATGCTAGC                                                    | TATTGTG   | CCCTTTGTG                                     | GGTTTGTG  | -TAATTCACAGAGAAAAGTCTGCT | 296                      |     |
| frog    | TATGCTAGC                                                    | TATTGTG   | CCCTTTGTG                                     | GGTTTGTG  | -TAATTCACAGAGAAAAGTCTG-  | CT                       |     |
| zfish   | TATGCACCC                                                    | TATTGTG   | CCCTTTGTG                                     | GGTTTGTG  | -TAATTCACAGAGAAAAGTCTGCT | 262                      |     |
| fugu    | TATGC                                                        | AAGCC     | TATTGTG                                       | CCCTTTGTG | GGTTTGTG                 | -TAATTCACAGAGAAAAGTCTGCT | 294 |
|         | *****                                                        | * * * * * | *****                                         | * * * * * | * * * * *                | *****                    |     |
|         |                                                              |           |                                               |           |                          |                          |     |
| human   | TTGT                                                         | ---       | 302                                           |           |                          |                          |     |
| chicken | TTGT                                                         | ---       | 303                                           |           |                          |                          |     |
| mouse   | TTGT                                                         | ---       | 300                                           |           |                          |                          |     |
| frog    | TTGTG                                                        | --        | 262                                           |           |                          |                          |     |
| zfish   | TTGTGGC                                                      |           | 269                                           |           |                          |                          |     |
| fugu    | TTGTAGC                                                      |           | 301                                           |           |                          |                          |     |
|         | ****                                                         |           |                                               |           |                          |                          |     |

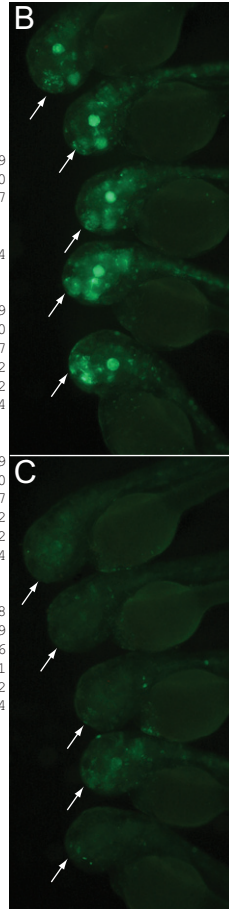

Supplement: mmc1.pdf [file mmc1.pdf]
